# Supplementary material for: Towards a comprehensive understanding of the chemical vapor deposition of titanium nitride using Ti(NMe2)4: a density functional theory approach
Source: Royal Society of Chemistry journal article supplement (doi:10.1039/c4dt00690a), 2014-01-01
Supplement: c4dt00690a1.pdf [file c4dt00690a1.pdf]

**Towards a comprehensive understanding of the chemical vapor deposition of titanium nitride using Ti(NMe<sub>2</sub>)<sub>4</sub>: a density functional theory approach**

**Kaushik Sen, Tahamida Banu, Tanay Debnath, Deepanwita Ghosh, and Abhijit K. Das\***

*Department of Spectroscopy, Indian Association for the Cultivation of Science, Jadavpur,  
Kolkata 700032, India*

**Supporting Information**

**Table S1** Partition functions (Q) used in the calculations of the rate constants and equilibrium constant of the reaction between TDMAT and NH<sub>3</sub>

| Species                                                  | M06L/LANL2DZ     |                    |                  |          |
|----------------------------------------------------------|------------------|--------------------|------------------|----------|
|                                                          | Q <sub>vib</sub> | Q <sub>trans</sub> | Q <sub>rot</sub> | Q        |
| Ti(NMe <sub>2</sub> ) <sub>4</sub>                       | 3.26E+08         | 3.24E+33           | 2.07E+06         | 2.19E+48 |
| NH <sub>3</sub>                                          | 1.09E+00         | 6.79E+31           | 6.86E+01         | 5.09E+33 |
| Ti(NMe <sub>2</sub> ) <sub>4</sub> ·NH <sub>3</sub> (C6) | 2.68E+09         | 3.62E+33           | 2.38E+06         | 2.31E+49 |
| TS7                                                      | 4.19E+07         | 3.62E+33           | 2.38E+06         | 3.62E+47 |
| (Me <sub>2</sub> N) <sub>3</sub> TiNH <sub>2</sub> (C7)  | 1.24E+07         | 2.66E+33           | 1.37E+06         | 4.53E+46 |
| TS8                                                      | 1.57E+06         | 2.66E+33           | 1.40E+06         | 5.83E+45 |

**Table S2** Imaginary frequencies ( $\nu_i$ ) of the transition states involved and Wigner's tunneling correction ( $\Gamma(T)$ ) for the reaction of TDMAT with NH<sub>3</sub>

| Reaction                                                                                                                               | TS  | $\nu_i/\text{cm}^{-1}$ | $\Gamma(T)$ |
|----------------------------------------------------------------------------------------------------------------------------------------|-----|------------------------|-------------|
| Ti(NMe <sub>2</sub> ) <sub>4</sub> ·NH <sub>3</sub> (C6) → (Me <sub>2</sub> N) <sub>3</sub> TiNH <sub>2</sub> (C7) + HNMe <sub>2</sub> | TS7 | 654 <i>i</i>           | 1.416       |
| (Me <sub>2</sub> N) <sub>3</sub> TiNH <sub>2</sub> (C7) → (Me <sub>2</sub> N) <sub>2</sub> TiNH (C8) + HNMe <sub>2</sub>               | TS8 | 1544 <i>i</i>          | 3.318       |
